# Supplementary material for: Are we advancing universal health coverage through cataract services? Protocol for a scoping review
Source: PubMed Central journal article supplement (PMC7348466; doi:10.1136/bmjopen-2020-039458), 2020-07-08
Supplement: bmjopen-2020-039458supp002.pdf [file bmjopen-2020-039458supp002.pdf]

## Annex 2: Search Results

## MEDLINE

1. (cataract\$ adj2 surg\$ adj2 rate\$).tw.
2. (rate\$ adj2 cataract\$ adj2 surg\$).tw.
3. (cataract\$ adj2 surg\$ adj2 coverage\$).tw.
4. (cataract\$ adj2 surg\$ adj2 outcome\$).tw.
5. (incidence adj4 cataract\$ adj2 surg\$).tw.
6. (rapid adj2 assessment adj3 cataract\$).tw.
7. Rapid Assessment of Avoidable Blindness.tw.
8. RAAB.tw.
9. Cataract Extraction/ec [Economics]
10. or/1-9
11. (universal adj2 health adj2 coverag\$).tw.
12. cataract\$.tw.
13. 11 and 12
14. 10 or 13
15. (cataract\$ adj10 (district\$ or region\$ or province\$ or state or states or territor\$ or sub-national or national or nation\$)).tw.
16. (cataract\$ adj10 (country or countries or worldwide or global\$ or Asia or China or India or Africa or Europe\$)).tw.
17. 15 or 16
18. "Quality of Health Care"/
19. Quality Improvement/
20. Delivery of Health Care/
21. National Health Programs/
22. State Medicine/
23. Regional Health Planning/
24. Health Planning/
25. Health Plan Implementation/
26. Health Planning Guidelines/
27. Health Care Reform/
28. Health Resources/
29. Health Priorities/
30. Health Services Research/
31. "health services needs and demand"/
32. Needs Assessment/
33. State Health Plans/
34. Regional Health Planning/
35. Community Health Planning/
36. Hospital Planning/
37. Regional Medical Programs/
38. Health Maintenance Organizations/
39. Comprehensive Health Care/
40. Health Facility Planning/
41. Health Facility Administration/
42. Hospital Administration/
43. exp Hospitals, public/
44. exp Hospitals, private/
45. health system\$.tw.
46. Models, Organizational/
47. Decision Making, Organizational/
48. Resource Allocation/
49. Efficiency, Organizational/
50. Organizational Innovation/
51. Delivery of Health Care, Integrated/
52. Interdisciplinary Communication/
53. Public Health/
54. Health Promotion/
55. Policy Making/
56. Program Development/
57. Program Evaluation/
58. Quality Control/
59. Quality Assurance, Health Care/
60. Benchmarking/
61. Capacity Building/
62. Health Services Accessibility/
63. Health Policy/
64. Surgical Procedures, Operative/
65. exp Surgical Equipment/
66. Health Care Rationing/
67. Medically Underserved Area/
68. Healthcare Disparities/
69. Health Status Disparities/
70. exp Attitude to Health/
71. "Patient Acceptance of Health Care"/
72. Health Education/
73. Public Opinion/

74. Health Behavior/
75. Social Behavior/
76. Superstitions/
77. exp Communication/
78. exp Culture/
79. Sex Factors/
80. (cataract\$ adj3 (woman or women or female or gender or sex or sexual or equit\$ or inequit\$)).tw.
81. Women's Rights/
82. Prejudice/
83. Vulnerable Populations/
84. Social Responsibility/
85. Social Welfare/ issue\$ or impede\$ or glossary or tool\$ or innovation\$ or examin\$ or reexamin\$ or scale\$ or
86. Urban Health Services/ outcome\$ or driv\$ or
87. Rural Health Services/ strateg\$ or advis\$ or expert\$)).tw.
88. Rural Population/
89. Patient Escort Service/
90. Health Manpower/
91. Health Personnel/
92. Health Workforce/
93. Workforce/
94. human resources for eye health.tw.
95. HReH.tw.
96. Medical Staff, Hospital/
97. Nursing Staff, Hospital/
98. Personnel, Hospital/
99. Professional Competence/ care.tw.
100. Clinical Competence/
101. Medical Errors/ remind\$.tw.
102. Clinical Governance/
103. Government Regulation/
104. Public Policy/ adhere\$)).tw.
105. Public Health Practice/ adhere\$)).tw.
106. Public Health Administration/
107. Health Plan Implementation/
108. Public-Private Sector Partnerships/
109. Delivery of Health Care, Integrated/
110. service delivery.tw.
111. decision making.tw.
112. (consensus adj3 (process\$ or discuss\$)).tw.
113. stakeholder\$.tw.
114. Quality Control/
122. quality management.tw.
123. (organisation\$ adj3 cultur\$).tw.
124. Disease Management/
125. Program Evaluation/
126. ((provider\$ or program\$) adj3 (monitor\$ or evaluate\$ or modif\$ or practice\$)).tw.
127. (implement\$ adj3 (improve\$ or change\$ or effort\$ or
128. (needs adj3 assess\$).tw.
129. ((education\$ or learn\$) adj5 (continu\$ or material\$ or meeting or collaborat\$)).tw.
130. exp Medical audit/
131. (audit or feedback or compliance or adherence or training or innovation).ti.
132. (guideline\$ adj3 (clinical or practice or implement\$ or promot\$)).tw.
133. exp Health Services Accessibility/
134. (outreach adj2 (service\$ or visit\$)).tw.
135. (intervention\$ adj3 (no or usual or routine or target\$ or tailor\$ or mediat\$)).tw.
136. usual
137. exp Reminder Systems/
- 138.
139. (improve\$ adj3 (attend\$ or visit\$ or intervention\$ or
140. (increas\$ adj3 (attend\$ or visit\$ or intervention\$ or
141. (appointment\$ adj3 (miss\$ or fail\$ or remind\$ or follow up\$)).tw.
142. Telephone/
143. telephone.tw.
144. Cell Phones/
145. Mobile Applications/
146. Remote Consultation/
147. (m-health or e-health or g-health or u-health).tw.

115. Total Quality Management/ 148. (phone\$ adj1 (smart or cell)).tw. 116. Quality Indicators, Health Care/  
 149. (smartphone\$ or cellphone\$).tw. 117. Quality Assurance, Health Care/ 150. (hand adj1 held  
 device\$).tw.
118. quality assurance.tw. 151. (mobile adj2 (health or healthcare or phone\$ or device\$ 119. (quality adj2  
 improv\$).tw. or monitor\$ or comput\$ or app or apps or application)).tw.
120. total quality.tw. 152. Primary Health Care/  
 121. continuous quality.tw.
153. General Practitioners/ or Physicians, Family/ or 184. Cost allocation/  
 Physicians, Primary Care/ 185. Cost-benefit analysis/  
 154. Primary Prevention/ 186. Cost control/  
 155. Preventive Health Services/ 187. Cost savings/  
 156. Community Health Services/ 188. Cost of illness/  
 157. Community Health Nursing/ 189. Cost sharing/  
 158. Health Services, Indigenous/ 190. "deductibles and coinsurance"/ 191. Medical  
 159. Rural Health Services/ 160. savings accounts/  
 Mobile Health Units/ 192. Health care costs/  
 161. (Ophthalmologist\$ or Optometrist\$ or Optician\$ or 193. Direct service costs/  
 Orthopist\$ or Refractionists).tw. 162. ((Ophthalmic or eye 194. Drug costs/  
 adj3 (surgeon\$ or nurse\$ or technician\$ or officer\$ or 195. Employer health costs/ 196. Hospital costs/ 197.  
 assistant\$ or staff\$)).tw. Health expenditures/ 198. Capital expenditures/  
 163. Physician's Practice Patterns/  
 164. Professional Practice/  
 165. (professional adj3 (practice or develop\$ or educat)).tw. 199. Value of life/  
 200. exp economics, hospital/ 201. exp  
 166. Education, Medical, Continuing/ economics, medical/ 202.  
 167. exp nurses/ Economics, nursing/  
 168. Specialties, Nursing/ 203. Economics,  
 169. Nurse's Role/ 170. Education, Nursing, Continuing/ pharmaceutical/  
 171. (nurse or nurses).tw. 204. exp "fees and charges"/  
 205. exp budgets/ 206.  
 172. ((role or roles) adj3 expan\$).tw. (low adj cost).mp.  
 173. (task\$ adj3 shift\$).tw. 207. (high adj  
 174. exp Medical Records Systems, Computerized/ cost).mp.  
 175. Management Information Systems/ 208. (health?care adj cost\$).mp.  
 176. Database Management Systems/ 209. (fiscal or funding or financial or finance).tw.  
 177. Computer Systems/ 178. Point-of-Care Systems/ 210. (cost adj estimate\$).mp.  
 179. Hospital Information Systems/ 211. (cost adj variable).mp. 212. (unit adj cost\$).mp.  
 180. ((health or healthcare) adj4 (record or management 213. (economic\$ or pharmacoeconomic\$ or price\$ or  
 system\$)).tw. pricing).tw.  
 181. (decision adj5 support).ti. 182. Economics/  
 214. Uncompensated Care/  
 183. "costs and cost analysis"/

215. Reimbursement Mechanisms/ Reimbursement, Incentive/ 216. (insurance adj3 (health\$ or scheme\$)).tw.
217. (financial or economic or pay or payment or copayment or paid or fee or fees or monetary or money or cash or incentiv\$ or disincentiv\$).tw.
218. ((pay or paying or paid or cost\$ or free or wait\$ or qualit\$) adj3 surg\$).tw. 220. (will\$ adj3 pay\$).tw. 221. (waiting adj2 time).tw.
222. ((surgery or surgical or surgeon\$ or ophthalmologist\$) adj2 (experience\$ or supervis\$ or rate or rates or output or volume or uptake number\$ or coverage or annual\$)).tw.
223. Gross Domestic Product/ 224. Medicare/ 225. human development index.tw. 226. gross domestic product.tw. 227. (HDI or GDP).tw.
228. Cataract Extraction/sn [Statistics & Numerical Data] 229. (global adj2 burden adj2 cataract\$).tw.
230. (cataract\$ adj3 (cost\$ or income\$ or price\$ or reimburse\$)).tw.
231. exp Patient Acceptance of health Care/ 232. exp Attitude to Health/ 233. exp Health Behavior/ 234. Health Education/ 235. exp Patient Education as Topic/ 236. exp Health Promotion/ 237. Socioeconomic Factors/ 238. exp Poverty/ 239. Social Class/ 240. Educational Status/ 241. ((school or education\$) adj3 (status or level\$ or attain\$ or achieve\$)).tw. 242. Employment/ 243. Healthcare Disparities/ 244. Health Status Disparities/ 245. exp Medically Underserved Area/ 246. Rural Population/ 247. Urban Population/ 248. exp Ethnic Groups/ 249. Minority Groups/ 250. Vulnerable Populations/ 251. ((health\$ or social\$ or racial\$ or ethnic\$) adj5 (inequalit\$ or inequit\$ or disparit\$ or equit\$ or disadvantage\$ or depriv\$)).tw. 252. (disadvant\$ or marginali\$ or underserved or under served or impoverish\$ or minorit\$ or racial\$ or ethnic\$).tw. 253. or/18-252 254. 17 and 253 255. 14 or 254 256. (femtosecond or phaco\$ or keratometry or vitrectomy or endophthalmitis).ti. 257. (glaucoma\$ or intraocular or IOL or keratoplast\$ or refractive or retinopathy or tear or uveitis).ti. 258. or/256-257 259. 255 not 258 260. limit 259 to yr="2010 -Current"
